# Supplementary material for: Mapping heartwater risk in Guadeloupe: a combination of spatial modelling approaches
Source: Research Square preprint supplement (doi:10.21203/rs.3.rs-7142010/v1), 2025-09-03
Supplement: Supplementary file 1 [file 593e483c522f12e6df3df7ca.docx]

# Supplementary material


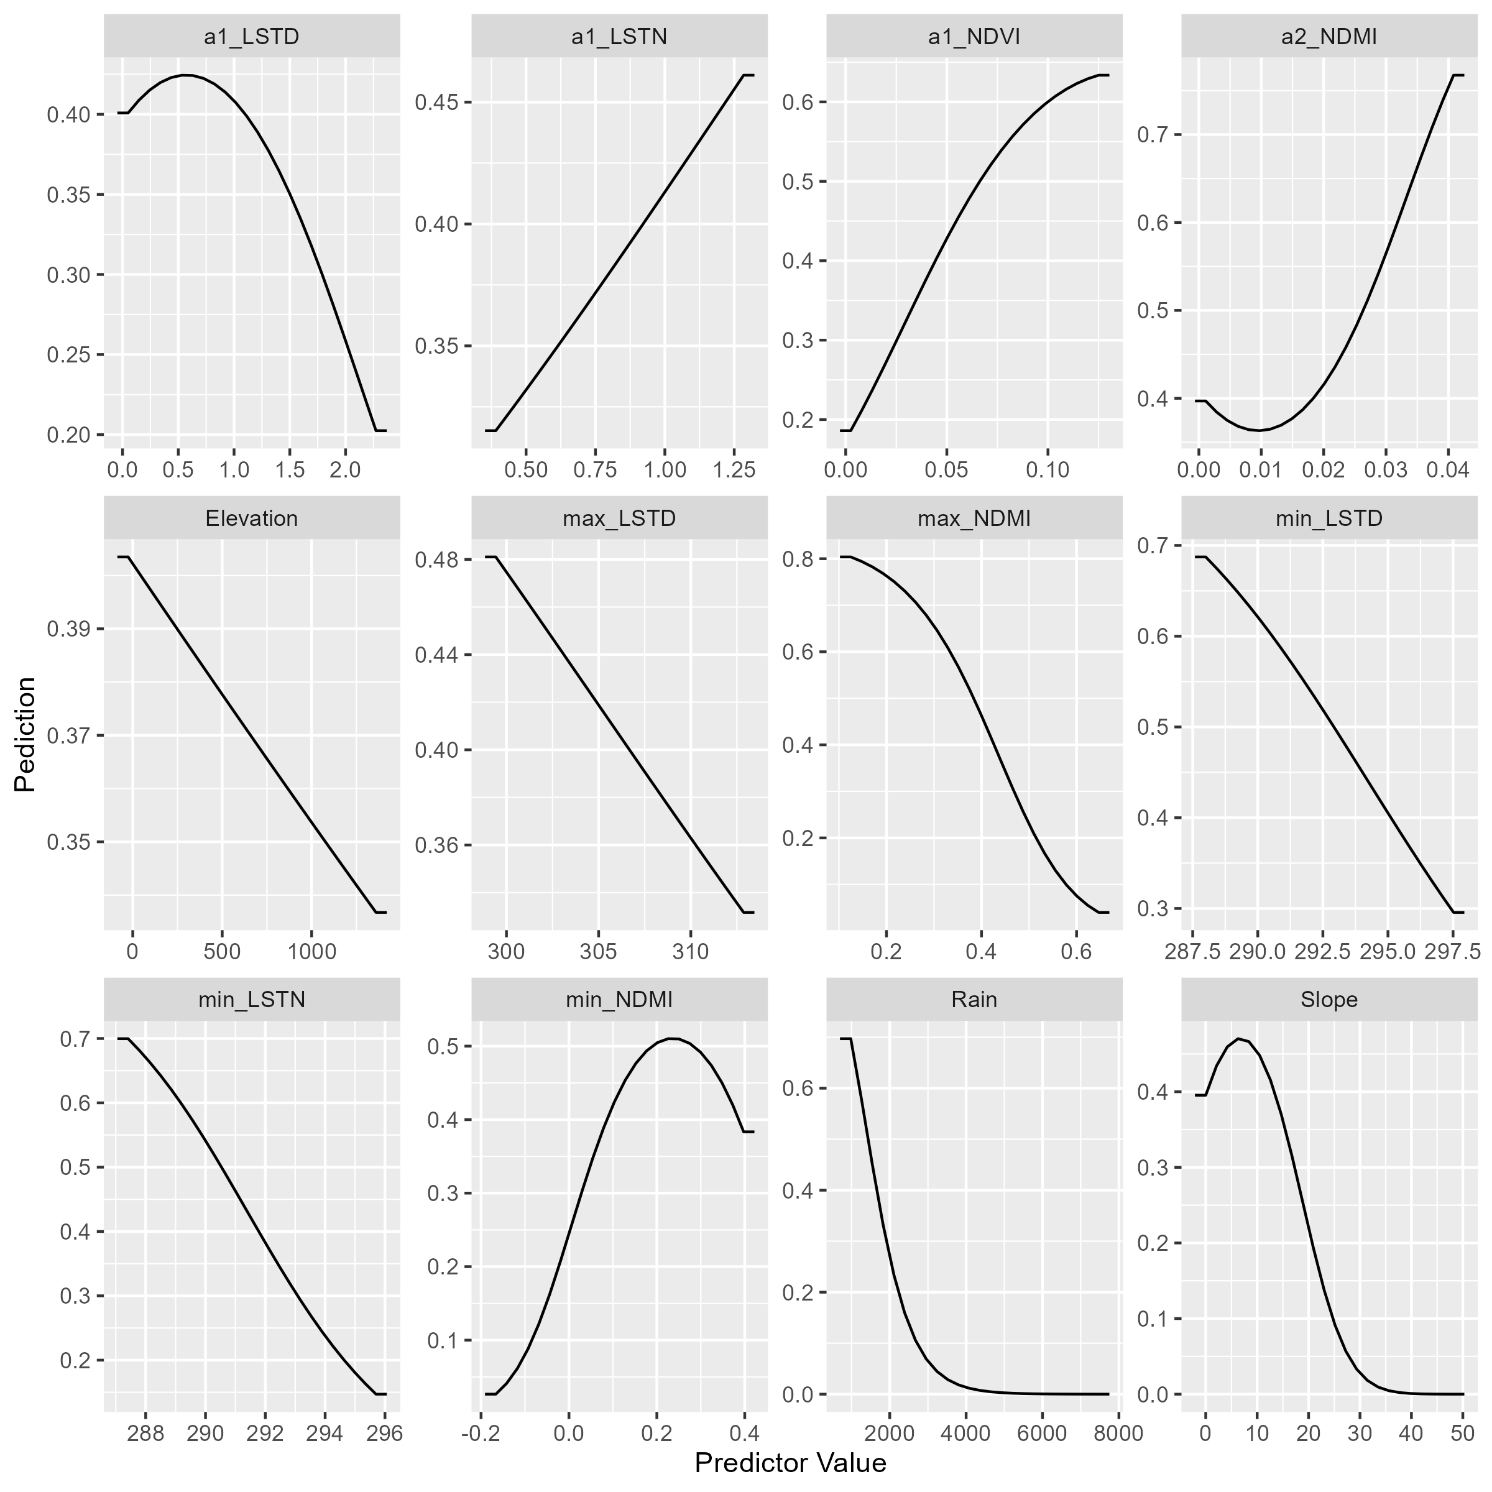


SM 1: Response curve obtained for A. variegatum with Maxent Model without landcover data.


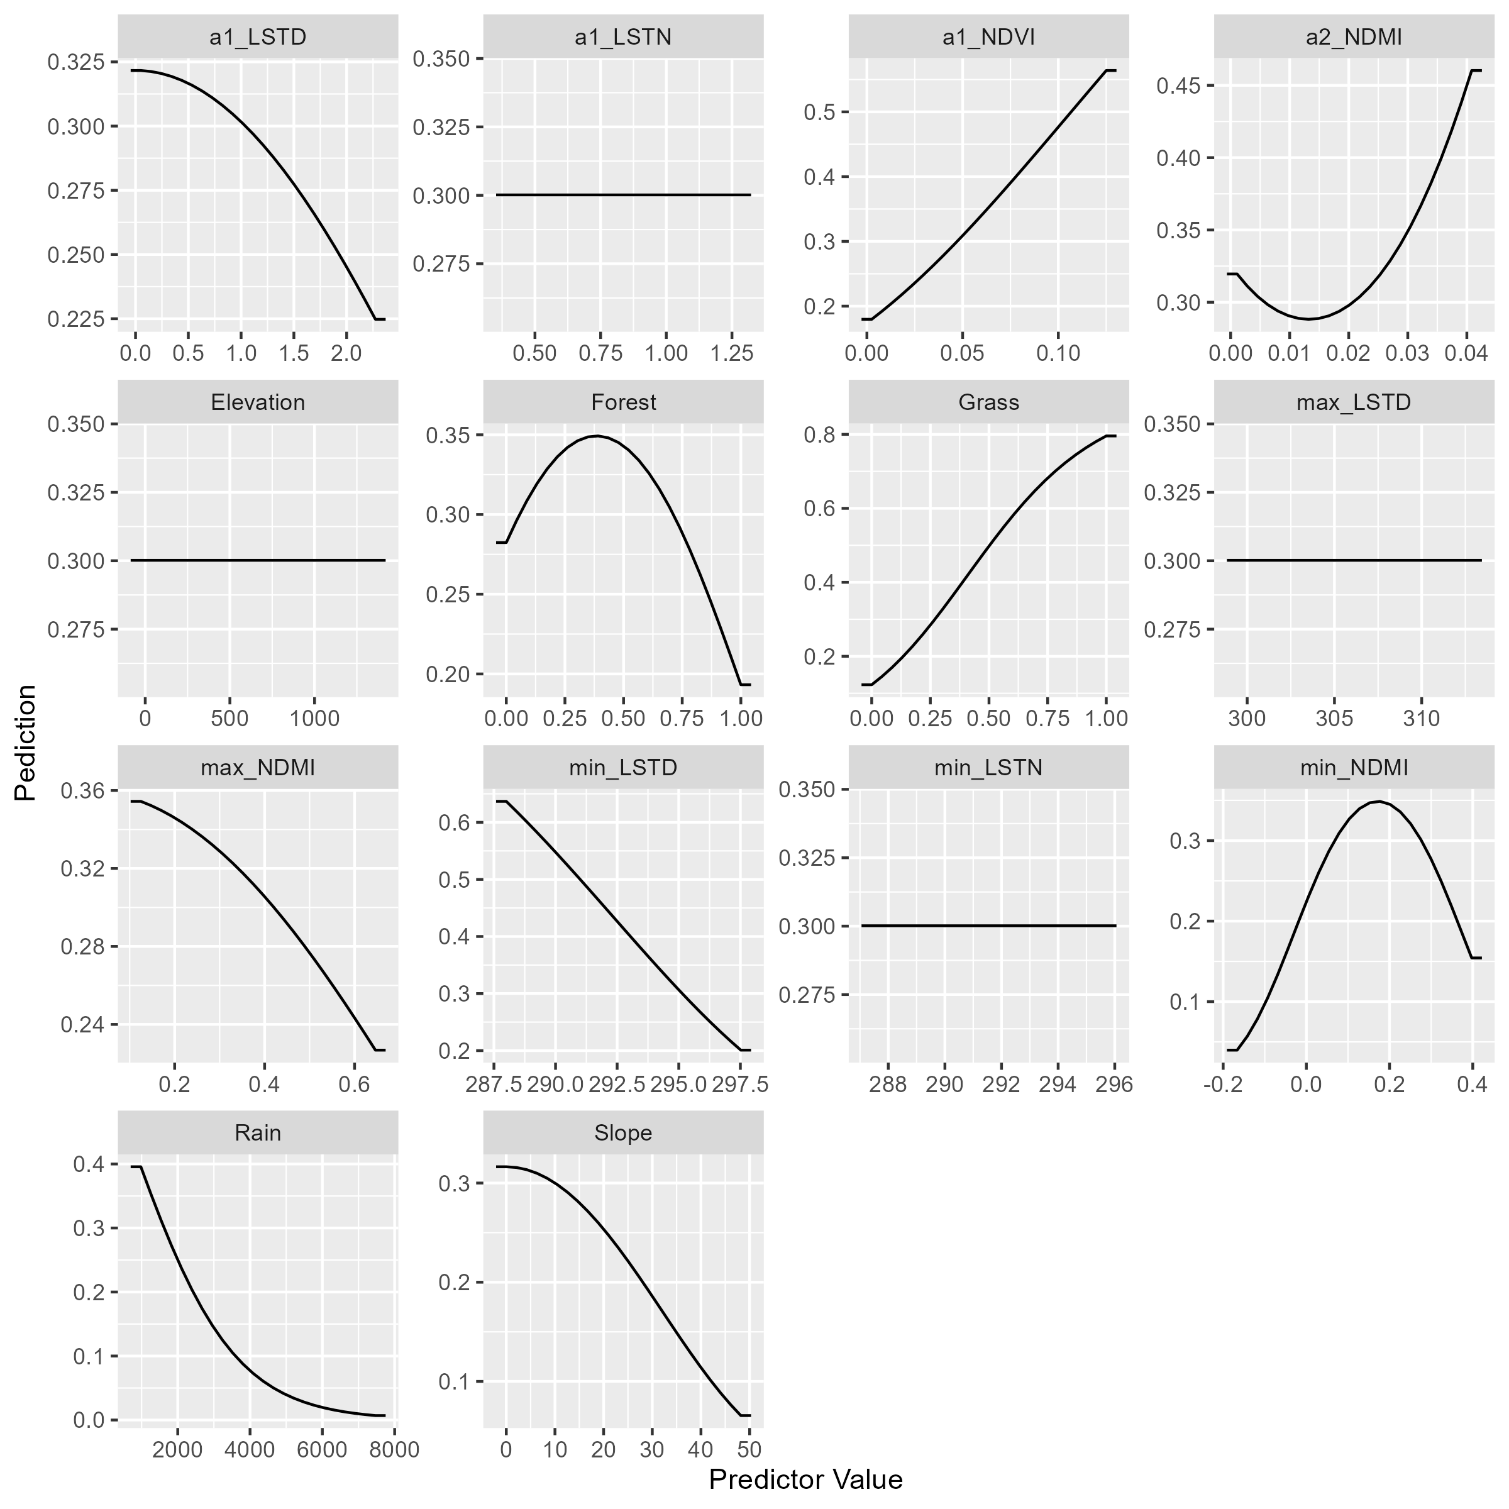


SM 2: Response curve obtained for A. variegatum with Maxent Model with landcover data.


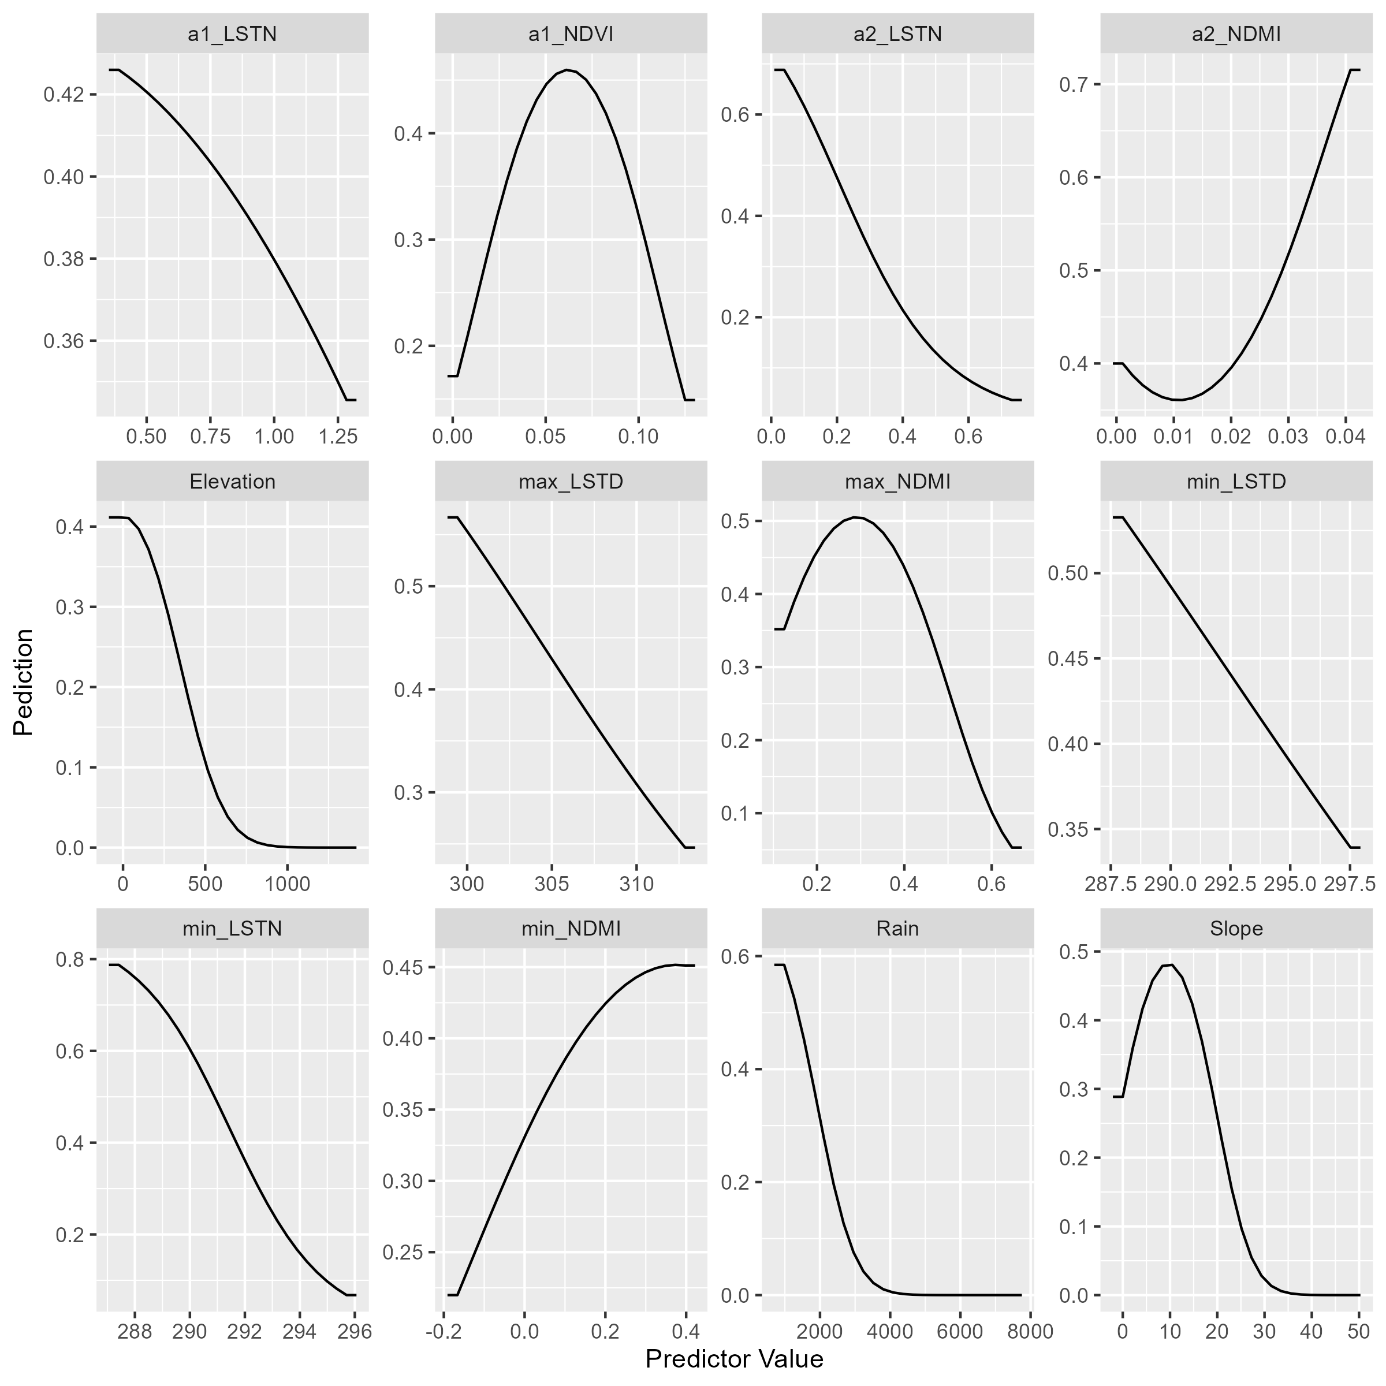


SM 3: Response curve obtained for R. microplus with Maxent Model without landcover data.


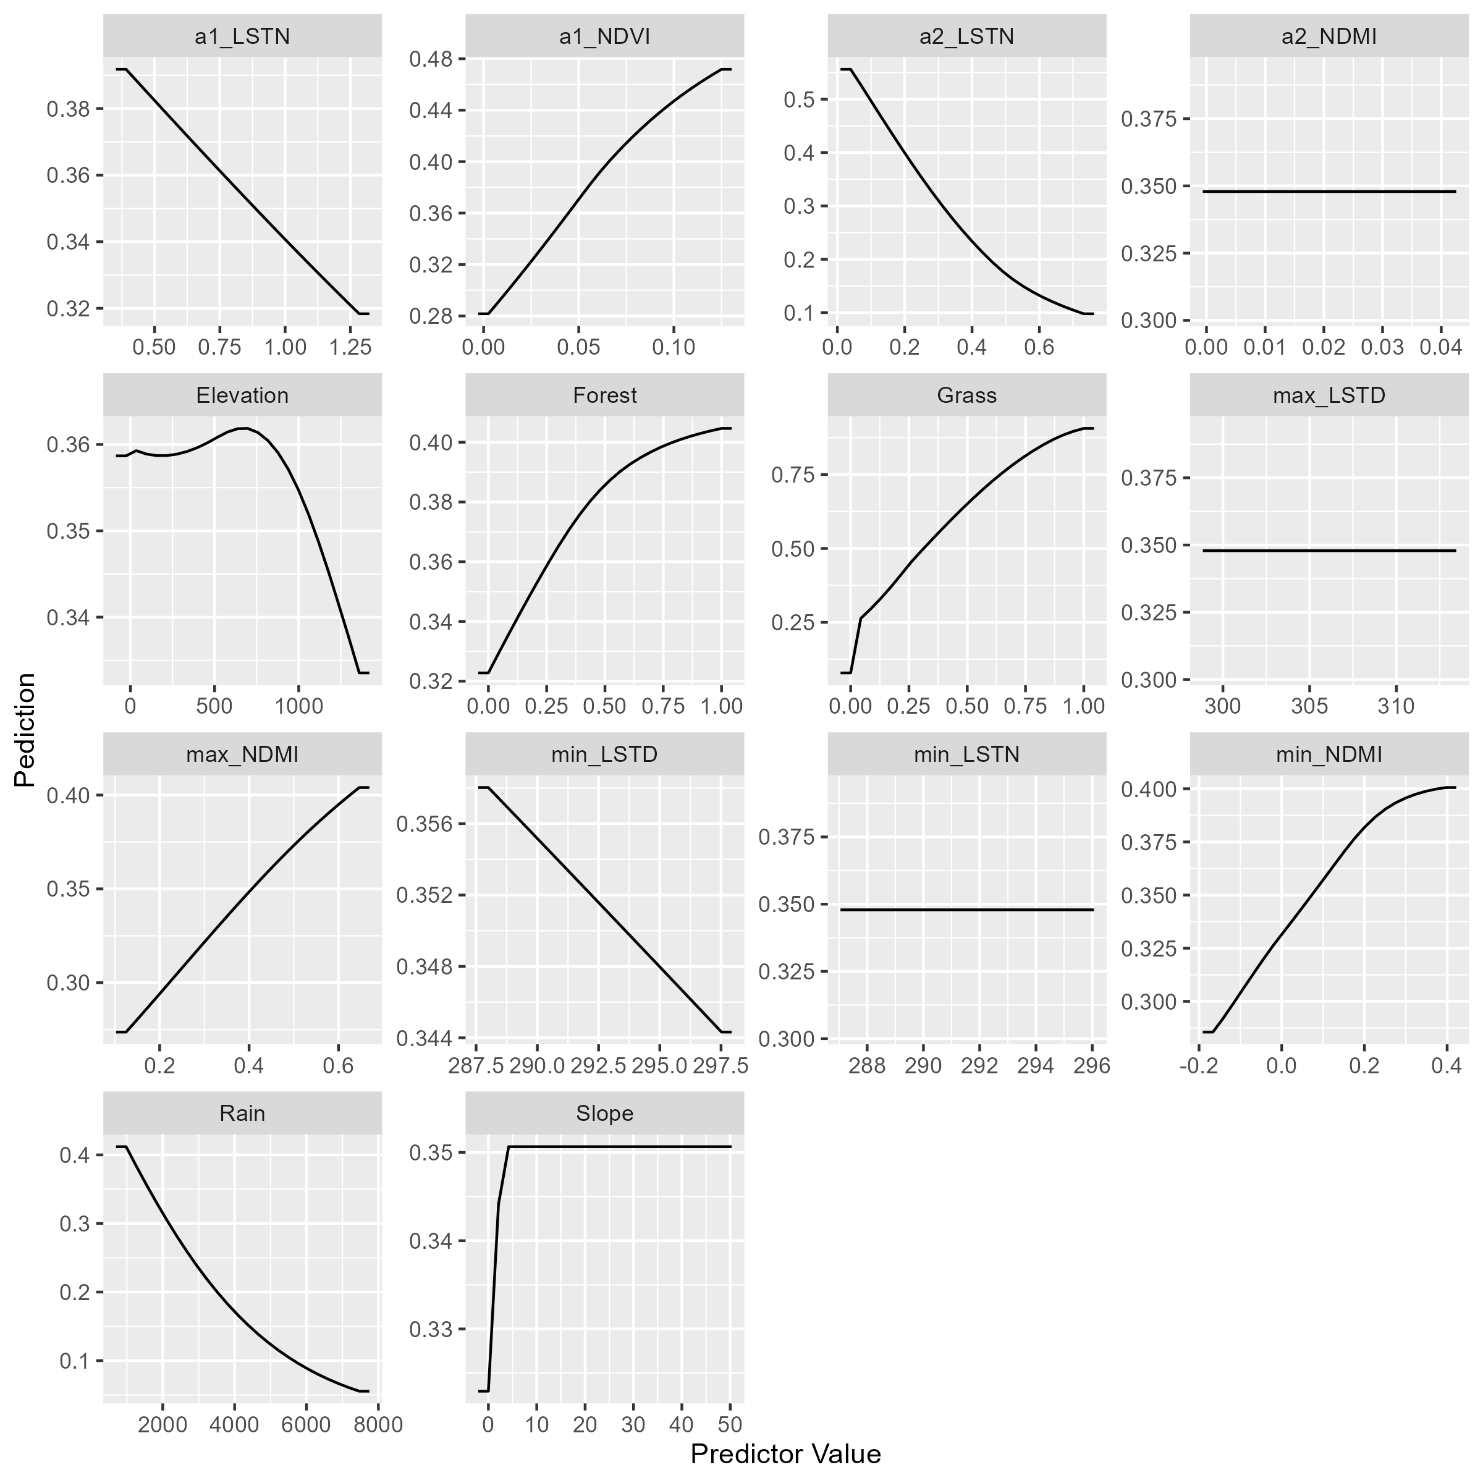


SM 4: Response curve obtained for R. microplus with Maxent Model with landcover data.
